# Supplementary material for: DNA Methylation Levels of the ELMO Gene Promoter CpG Islands in Human Glioblastomas
Source: Int J Mol Sci. 2018 Feb 28;19(3):679. doi: 10.3390/ijms19030679 (PMC5877540; doi:10.3390/ijms19030679)
Supplement: Supplementary file 1 [file ijms-19-00679-s001.xlsx]

## Sheet: Pyrosequencing data
	Methylation levels (%) using pyrosequencing
Sample ID	ELMO1	ELMO2	ELMO3
1	no data	2.39571	74
2	no data	2.65571	92
3	4.85333	2.02286	77.5
4	13.74	2.62	95.2
5	no data	25.2129	98.5
6	8.84667	5.39714	88.2
7	5.20333	2.89857	88.4
8	9.18667	3.83857	94.3
9	11.68	4.94571	82.8
10	8.65667	9.45286	73.2
11	3.39333	2.35286	96.8
12	9.76333	6.65714	90.3
13	16.37	2.77571	82.2
14	7.79	5.02286	94.7
15	8.44667	5.03714	90.6
16	9.99333	no data	80.3
17	11.2933	no data	94.2
18	9.56667	1.45143	60.4
19	6.33333	2.29714	94.3
20	no data	3.32286	84
21	12.87	5.54857	81.3
22	5.83	2.64429	81.5
23	2.14	2.78	93.9
24	3.92	2.69429	96
25	4.84	2.84429	95.4
26	3.31	2.93429	89.2
27	7.38	2.48429	78.3
28	3.62333	4.70571	92.8
29	3.53	2.99714	84.4
30	2.87333	2.28429	96.2
31	4.01	1.88286	95.5
32	9.67	1.8	94.1
33	6.20333	1.8	87.8
34	5.00667	1.87	91.6
35	9.23667	no data	77.3
36	4.97667	2.03714	86.4
37	8.18667	no data	61.2
38	5.8	2.79286	74.8
39	3.06667	2.90286	75.3
40	5.45333	3.16857	82.3
41	10.2167	5.51857	82.9
42	9.92667	no data	86.4
43	10.8567	2.62714	32.5
44	5.66667	2.71429	52.6
45	4.83333	2.39286	84.5
46	4.65	3.27	93.1
47	7.31667	no data	74.5
48	11.21	2.39571	88.1
49	5.05667	3.75143	82.6
50	4.39667	2.61857	94.1
51	4.79333	2.86286	79.3
52	13.8833	3.53857	86.2
53	4.49667	3.00571	90.4
54	5.23667	3.12	91.4
55	4.29667	2.95286	64.3
56	4.53333	2.02286	39.9
57	no data	2.02143	93.9
58	5.71333	2.97286	57.4
59	9.8	2.65429	72.5
60	7.75	3.21429	84.7
61	7.71667	no data	70.9
62	4.55667	2.73857	84.3
63	3.92	2.44	86.7
64	no data	no data	77
65	no data	2.45714	83.3
66	4.44333	4.60429	74
67	3.46333	2.27286	76.1
68	2.86333	2.55	72.1
69	4.32667	2.70571	91
70	5.93333	2.78429	86.5
71	4.17333	2.95857	no data
72	3.97667	2.33714	87.6
73	4.94667	2.24	no data
74	3.17	2.67	78.8
75	19.7633	no data	83.1
76	3.85333	2.97	96.6
77	4.92333	3.00429	59.6
78	4.37	no data	65.7
79	10.18	no data	92.4
80	7.83667	3.12	88.3
81	5.95333	no data	79.5
82	3.81333	2.55857	58.4
83	3.12	no data	86
84	3.42	no data	58.4
85	no data	4.10429	91.1
86	6.62333	2.20714	78.3
87	5.17	2.27143	63
88	4.28333	3.13857	81.7
89	3.64333	3.61429	90
90	8.54333	no data	79.9
91	8.50667	6.51429	71.7
92	18.9833	7.53857	71.6
93	10.8	3.73714	95.1
94	4.84	1.89571	92.5
95	5.16333	3.21143	67.9
96	4.26	5.48429	66.4
97	6.85	no data	59.5
98	no data	2.07714	53.7
99	4.75667	1.70286	69.6
100	3.60333	2.79571	79.5
101	3.73333	8.02	88
102	4.08	2.34	83
103	6.61	2.08286	94.7
104	5.37	4.13857	79.5
105	7.88333	2.75143	78
106	4.02333	no data	86.1
107	6.9	2.72143	78
108	4.95	2.58	84.8
109	28.1733	3.54857	81.6
110	3.51667	2.56143	78.2
111	5.89333	2.58714	95.3
112	9.37333	2.53429	71.4
113	4.63667	2.56714	86.4
114	7.4	no data	62.8
115	7.62	2.71714	34.4
116	4.79667	2.35	82
117	8.90333	2.41857	88.5
118	8.85333	2.37857	62.7
119	5.14667	2.51429	88.2
120	3.06	2.20286	81.7
121	11.5	2.78714	83.9
